# Supplementary material for: Allometry of bud dynamic pattern and linkage between bud traits and ecological stoichiometry of Nitraria tangutorum under fertilizer addition
Source: PeerJ. 2023 Mar 21;11:e14934. doi: 10.7717/peerj.14934 (PMC10038085; doi:10.7717/peerj.14934)
Supplement: Supplemental Information 1 [file peerj-11-14934-s001.xlsx]

## Sheet: Sheet1
NP	quadrats	Year	D1	D2	D3	D4	D5	D6	D7	V1	V2	V3	V4	V5	V6	V7	R1	R2	R3	R4	R5	R6	R7	D	V	R
N0	1	2015	3	6	1					9	16	1	2				1	4	3					10	28	8
N0	1	2016	1	18	16	1				16	62	106	79	19				2	5	1				36	282	8
N0	1	2017	4	5	2					17	84	33						10						11	134	10
N0	2	2015	8	19	9					29	28	13	4				1	11	10	1				36	74	23
N0	2	2016	3	35	16					17	40	37	48					1	7					54	142	8
N0	2	2017	2	13						22	104	59						56						15	185	56
N0	3	2015	2	34	44	8				14	9	3					4	24	22					88	26	50
N0	3	2016	2	48	58	26	1			21	46	119	224	57	6			12	29	11	1			135	473	53
N0	3	2017	4	3						6	34						2							7	40	2
N0	4	2015	3	2						17	32							10						5	49	10
N0	4	2016	3	19						11	40	57					5	12						22	108	17
N0	4	2017	3	19	2					11	52	27					1							24	90	1
N0	5	2015	5	21	7					12	8							8						33	20	8
N0	5	2016	5	10	5					9	29	43	8				2	7	2					20	89	11
N0	5	2017	7	12						4	21	4					3							19	29	3
N0	6	2015	6	38						14	15						12	9						44	29	21
N0	6	2016	6	100	143					17	32	59	10					6						249	118	6
N0	6	2017	6	5	6					5	15	33	6				1	1						17	59	2
N0	7	2015	8	2	6					4	20	25	3					8	11					16	52	19
N0	7	2016	8	2	8	1	3			8	26	94	57	19				2	3					22	204	5
N0	7	2017	8	10						8	27							10	15					18	35	25
N0	8	2015	7							7	4						5	8						7	11	13
N0	8	2016	7	9	5					10	37	139	82	10			1	20	9	1				21	278	31
N0	8	2017	2	14	19					14	62	57						25	17					35	133	42
N0	9	2015	15	4	1					9	5	2	1				1	1	1	1	1			20	17	5
N0	9	2016	4	19	27	7				6	19	37	52						17	15				57	114	32
N0	9	2017	4	19						5							2	14						23	5	16
N10	10	2015	7	19	10	1				9	9	3					1	8	9	1				37	21	19
N10	10	2016	7	39						13	80	65					13	14						46	158	27
N10	10	2017		3						11	67	116						19						3	194	19
N10	11	2015	13	24	19	6				14	18	5	1				1	12	13	4				62	38	30
N10	11	2016	8	64	27	12	11			12	42	50	61	51	5	9	1	8	10	12	1	2		122	230	34
N10	11	2017	6	32	3					23	85	95						1						41	203	1
N10	12	2015		26	9	3				19	6						1	16	1					38	25	18
N10	12	2016	6	41	31					13	30	55	63	10				5	4	2				78	171	11
N10	12	2017	7	14	4					15	65	165	9				3	6	1					25	254	10
N10	13	2015	11	42	29					12	11							13	15					82	23	28
N10	13	2016	15	48	25	21	16	12		12	29	44	70	87	49	3		4	6	13	3	1		137	294	27
N10	13	2017	2	11						8	101	12					4							13	121	4
N10	14	2015	9	2	10					4	8	1												21	13	0
N10	14	2016	7	14	19	9	2			5	20	53	192	18	9			3	27		1			51	297	31
N10	14	2017	1	10	3					5	25	91	4					4						14	125	4
N10	15	2015	1							20	44						6							1	64	6
N10	15	2016	4	66	95	3				23	92	279	111				10	70	35					168	505	115
N10	15	2017	1	35	4	3				25	48	143	67	3			1	43						43	286	44
N10	16	2015	9	2						3	9	13					1	13	1					11	25	15
N10	16	2016	11	12						15	73	76					1	19						23	164	20
N10	16	2017	4							14							5							4	14	5
N10	17	2015	1							2	6	15					4							1	23	4
N10	17	2016	12	52	4					10	14	27	7					4						68	58	4
N10	17	2017	9	38	3					12	43	102					1	8	10					50	157	19
N10	18	2015	3	26						16	25						4	23						29	41	27
N10	18	2016	3	14						13	55	137						1						17	205	1
N10	18	2017	8	45	14					18	85	156					3	8	8					67	259	19
N20	19	2015	8	14	5					4	3	1					7	5	1					27	8	13
N20	19	2016	10	13	19					9	15	22	14					1	4					42	60	5
N20	19	2017	14	28	4	1				9	30	54	9	2										47	104	0
N20	20	2015	6	25	6					14	17	16					1	6	13	3				37	47	23
N20	20	2016	4	42	46	12				17	33	51	48	20					3	7				104	169	10
N20	20	2017	6	17	15	8	2			7	23	34	73	25						1				48	162	1
N20	21	2015	3	22						15	10						2	28						25	25	30
N20	21	2016	13	60	38					12	25	28	11				1	4	3					111	76	8
N20	21	2017	6	7	3					9	47	99	20				2	2						16	175	4
N20	22	2015	6	5	7					3	17	8						1	7					18	28	8
N20	22	2016	3	51	33					27	90	427	130	2			5	101	41	1				87	676	148
N20	22	2017	8	7	6					5	14	59	49				2	3						21	127	5
N20	23	2015	6	11	10					4	19						6	9						27	23	15
N20	23	2016	2	22						17	57	126					5	30						24	200	35
N20	23	2017	24	38	13	14	2			10	37	75	97	15										91	234	0
N20	24	2015	5							29														5	29	0
N20	24	2016	3	16	2					12	51	126	17				6	22	6					21	206	34
N20	24	2017	5	17	5					19	72	95						2						27	186	2
N20	25	2015	19	11	39	13				6	10	6	1				2	2	13	10				82	23	27
N20	25	2016	9	17	20	13	5			7	13	14	29	15	3				3	2	1			64	81	6
N20	25	2017	2	10						21	113						6	1						12	134	7
N20	26	2015	1							5	45							5						1	50	5
N20	26	2016		5						9	49	96	3				5	10						5	157	15
N20	26	2017	4	30	1					22	78	201					2	9	1					35	301	12
N20	27	2015	6	37						8	9						13	18						43	17	31
N20	27	2016	12	65	31	5	1			12	34	65	85	18			1	2	9	1	1			114	214	14
N20	27	2017		15	7					19	106	259					1	18	1					22	384	20
C	28	2015	11	16	7					13	10	3						6	7					34	26	13
C	28	2016	11	29	16					8	20	60	6				1	12	2					56	94	15
C	28	2017	16	14	14	3	2			2	22	79	28	6						22				49	137	22
C	29	2015	10	21	16					7	3							10						47	10	10
C	29	2016	10	36	21	8	11			10	38	99	109	29	9			19	25	5	1			86	294	50
C	29	2017	9	16	7					20	46	23	7						15	16				32	96	31
C	30	2015		3						16	14							5						3	30	5
C	30	2016	6	10						10	43	16					2	4						16	69	6
C	30	2017	9	45	12					11	40	87	28							5				66	166	5
C	31	2015	3	3						8	6													6	14	0
C	31	2016	6	31	5					13	47	107	25					7						42	192	7
C	31	2017	12	13	6	2	2			3	6	31	80	13					1					35	133	1
C	32	2015	1							6	11						6							1	17	6
C	32	2016	9	16	2					7	15	13							5					27	35	5
C	32	2017	2	6	13					3	18	51	18					10	1					21	90	11
C	33	2015	7							18														7	18	0
C	33	2016	4	6						14	53	114					10	33						10	181	43
C	33	2017	8	4						4	25						6							12	29	6
C	34	2015	6	9						7	14	3						1						15	24	1
C	34	2016	3	32	12					14	60	53	9				4	1						47	136	5
C	34	2017	13	79	44					22	55	154						38	4					136	231	42
C	35	2015	10	19						19	79	23					1	7	3					29	121	11
C	35	2016	9	37	19					13	49	88	44						4					65	194	4
C	35	2017	10	87	152	67				11	43	101	83						1					316	238	1
C	36	2015	1	5						5	12						15	14						6	17	29
C	36	2016	3	47	25					15	41	62	24						1					75	142	1
C	36	2017	25	132	155					11	92	283						34	13					312	386	47
P0	37	2015	3	5	17					5	4	9							2					25	18	2
P0	37	2016	7	9	25					1	6	9												41	16	0
P0	37	2017	1							16	82	73	17					8	6					1	188	14
P0	38	2015								10	3						4	3						0	13	7
P0	38	2016	16	2	4					7	4	1												22	12	0
P0	38	2017	1	1	1					30	7	3	13						3					3	53	3
P0	39	2015	1	12	10					11								18						23	11	18
P0	39	2016	4	27	31	3				6	19	43	32						2					65	100	2
P0	39	2017	8	6						14	111	74					1							14	199	1
P0	40	2015	11	10	14	2				16	12	7	2				2	6	8	6				37	37	22
P0	40	2016	13	4	5	7				15	19	38	39	10			1	4	5	1				29	121	11
P0	40	2017	3	11	1					12	36	62					1	1						15	110	2
P0	41	2015	11	15	6	1				14	7	5	1				6	1	6	1				33	27	14
P0	41	2016		25	12					13	45	54					5	13						37	112	18
P0	41	2017	3	18						19	25	39												21	83	0
P0	42	2015	1	9	8					8	10							21	8					18	18	29
P0	42	2016	1	26	33	34				10	25	60	98	29				4	14	2				94	222	20
P0	42	2017	1	7	14	3				2	14	60	49	18										25	143	0
P0	43	2015		2						8	15						8							2	23	8
P0	43	2016	3	9	8	5				17	31	43	43	18				5	8	4	1			25	152	18
P0	43	2017	9	18	1	1				1	16	80	158	60	4			5	10					29	319	15
P0	44	2015	10	4	2					17	12						3	11	4					16	29	18
P0	44	2016	6	24	9					10	38	50	1	13				1		3				39	112	4
P0	44	2017	15	39	14					15	23	91						5						68	129	5
P0	45	2015	4	5	8	5				20	32	32	6				1	6	6	1				22	90	14
P0	45	2016	6	19	20	11				13	27	61	44	14				6	7	4				56	159	17
P0	45	2017	3							24	95							4	6					3	119	10
P6	46	2015	10	13	9					11	25	18	1					11	19	2				32	55	32
P6	46	2016	9	17	19	12	2			8	18	46	65	38	4			8	15	10	1			59	179	34
P6	46	2017		4	13	3				2	27	85	90	37					25	45	26			20	241	96
P6	47	2015	3	4	14	5				7	8	7	8					1		8				26	30	9
P6	47	2016	7	19	42	12				4	8	16	11						12	9				80	39	21
P6	47	2017	3	29	11					16	40	58	19						23	19				43	133	42
P6	48	2015		2						3	15								8					2	18	8
P6	48	2016	1	10						13	76	57					7	12						11	146	19
P6	48	2017	8	55	35	4				9	28	104	25	4					45	22				102	170	67
P6	49	2015	1	11	33	7				10	14	7						1	10					52	31	11
P6	49	2016	3	14	19	22	3			7	20	49	136	91	80	13		3	24	18	15	3		61	396	63
P6	49	2017	4	18	6	8	2			4	4	8	5	29	3					2	25			38	53	27
P6	50	2015	3							13							5							3	13	5
P6	50	2016		11						10	31	27					2	23	11					11	68	36
P6	50	2017		1						20	87							23						1	107	23
P6	51	2015	2	25	15					21	33	18					3	61	19					42	72	83
P6	51	2016	1	24						14	38	123					3	21						25	175	24
P6	51	2017	4	4						12	69	15					8	45						8	96	53
P6	52	2015	2	4						10	22						8							6	32	8
P6	52	2016	8	15	28	16	3			12	32	27	36	10				13	1	24				70	117	38
P6	52	2017	4	10						10	48						1	35						14	58	36
P6	53	2015	9	29	1					10	1						6	18	2					39	11	26
P6	53	2016	2	46	34	6				15	29	54	56	24			2	9	12	6				88	178	29
P6	53	2017	23	53	13					9	60	104	31				4	2	34					89	204	40
P6	54	2015	4	15	41	3				8	16	9	13				11	7	28	16				63	46	62
P6	54	2016	13	59	34					11	39	43	61				1	3	11					106	154	15
P6	54	2017	12	37	15					11	46	81						2						64	138	2
P12	55	2015	11	21	2					9	7	4					10	2	2					34	20	14
P12	55	2016	3	6						8	31	14						1						9	53	1
P12	55	2017	5	42	22	5				21	95	257	119						34	45				74	492	79
P12	56	2015	2	13						17	20						1	26						15	37	27
P12	56	2016	5	13						8	27	3					1							18	38	1
P12	56	2017	11	50	17	4				9	75	153	21	4					44					82	262	44
P12	57	2015	10	26						25	21	5					5	26						36	51	31
P12	57	2016	6	29						20	47	40						1						35	107	1
P12	57	2017	6	2						14	40	22					2							8	76	2
P12	58	2015	3	9						14	3						12	20						12	17	32
P12	58	2016	12	55	11					24	39	24	5						19					78	92	19
P12	58	2017	3	5						14	89	73	3						45					8	179	45
P12	59	2015	2							18							2							2	18	2
P12	59	2016	3	13	26					11	26	23	64						2					42	124	2
P12	59	2017	2	12	9	2				19	26	41	33	22					23	22				25	141	45
P12	60	2015	6	1	3					4	4						3	4	10					10	8	17
P12	60	2016	5	19	12	8				8	23	38	23	2				5	1					44	94	6
P12	60	2017		2						22	107	25					9							2	154	9
P12	61	2015	3	4	1					1	9	4	28	2				7	21	4	3			8	44	35
P12	61	2016	5	19	15	5	1			15	46	120	202	39	12		1	16	37	7	3			45	434	64
P12	61	2017	3	20						12	42						5	29						23	54	34
P12	62	2015	8	8	1	1				11	6	3	1				2	12	3					18	21	17
P12	62	2016	6	21	7	4				12	36	28	19	6			3	2	4	1				38	101	10
P12	62	2017	12	18	2					16	39	84					2	10	1					32	139	13
P12	63	2015	14	32	25	2				10	7	2					3	7	14	3				73	19	27
P12	63	2016		6	8					10	30	49	29					7	10					14	118	17
P12	63	2017	8	41	3					14	29	111						28						52	154	28
